# Supplementary material for: A new computational method for molecular design of a liquid–liquid extractant and related phase equilibrium based on group contribution
Source: Royal Society of Chemistry journal article supplement (doi:10.1039/d0me00108b), 2020-01-01
Supplement: d0me00108b1.pdf [file d0me00108b1.pdf]

## **Supplementary Information**

### **New computational method for molecular design of liquid-liquid extractant and related phase equilibrium based on group contribution**

Yingying Guo, Hong Zeng, Hang Song\*, Shun Yao\*

*School of Chemical Engineering, Sichuan University, Chengdu, 610065, P. R. China*

Corresponding author: Hang Song, e-mail: [pharmposter2012@163.com](mailto:pharmposter2012@163.com), Shun Yao,  
e-mail: [Cusack@scu.edu.cn](mailto:Cusack@scu.edu.cn)

Tel.: +86-028-85405221; fax: +86-028-85405221

## Table of Contents

|                                     |         |
|-------------------------------------|---------|
| Combinational selectivity ( $S^C$ ) | S3-S4   |
| Four situations for function $f(A)$ | S5-S9   |
| Residual selectivity ( $S^R$ )      | S10-S11 |
| Table S1. $\theta\Psi$ matrix       | S12     |

### Combinational selectivity ( $S^C$ )

From Eq. (8) on the page 7 of the paper, there is:

$$\begin{aligned}\ln S^C &= \ln\left[\left(\frac{\gamma_1^C}{\gamma_2^C}\right)^r \middle/ \left(\frac{\gamma_1^C}{\gamma_2^C}\right)^e\right] \\ &= \ln\left(\frac{\gamma_1^C}{\gamma_2^C}\right)^r - \ln\left(\frac{\gamma_1^C}{\gamma_2^C}\right)^e\end{aligned}\quad (S1)$$

The combined activity coefficient of the combinatorial part (Eq. (3)) is substituted into the above equation to obtain Eq. (S2).

$$\begin{aligned}\ln S^C &= \ln\left(\frac{\gamma_1^C}{\gamma_2^C}\right)^r - \ln\left(\frac{\gamma_1^C}{\gamma_2^C}\right)^e \\ &= \ln(\gamma_1^C)^r - \ln(\gamma_2^C)^r - \left(\ln(\gamma_1^C)^e - \ln(\gamma_2^C)^e\right) \\ &= 5(q_1 - q_2) \ln \frac{\sum_{j=1}^3 q_j y_j}{\sum_{j=1}^3 q_j x_j} + (r_1 - r_2) \left[ \frac{\sum_{j=1}^3 y_j l_j}{\sum_{j=1}^3 r_j y_j} - \frac{\sum_{j=1}^3 x_j l_j}{\sum_{j=1}^3 r_j x_j} \right] - 5(q_1 - q_2) \ln \frac{\sum_{j=1}^3 r_j y_j}{\sum_{j=1}^3 r_j x_j} \\ &= 5(q_1 - q_2) \ln \left( \frac{\sum_{j=1}^3 q_j y_j}{\sum_{j=1}^3 r_j y_j} \middle/ \frac{\sum_{j=1}^3 q_j x_j}{\sum_{j=1}^3 r_j x_j} \right) + (r_1 - r_2) \left[ \frac{\sum_{j=1}^3 y_j l_j}{\sum_{j=1}^3 r_j y_j} - \frac{\sum_{j=1}^3 x_j l_j}{\sum_{j=1}^3 r_j x_j} \right]\end{aligned}\quad (S2)$$

If parameter B is introduced here as:

$$B = \frac{\sum_{j=1}^3 y_j l_j}{\sum_{j=1}^3 r_j y_j} - \frac{\sum_{j=1}^3 x_j l_j}{\sum_{j=1}^3 r_j x_j} \quad (S3)$$

$$\text{Due to } l_i = 5(r_i - q_i) - (r_i - 1) = 4r_i - 5q_i + 1 \quad (S4)$$

Now Eq. (S4) is substituted into Eq. (S3) and Eq. (S5) can be obtained as follows.

$$B = 4 - 5 \frac{\sum_{j=1}^3 y_j q_j}{\sum_{j=1}^3 r_j y_j} + \frac{1}{\sum_{j=1}^3 r_j y_j} - \left[ 4 - 5 \frac{\sum_{j=1}^3 x_j q_j}{\sum_{j=1}^3 r_j x_j} + \frac{1}{\sum_{j=1}^3 r_j x_j} \right]$$

$$= 5 \left( \frac{\sum_{j=1}^3 x_j q_j}{\sum_{j=1}^3 r_j x_j} - \frac{\sum_{j=1}^3 y_j q_j}{\sum_{j=1}^3 r_j y_j} \right) + \frac{\sum_{j=1}^3 r_j (x_j - y_j)}{\sum_{j=1}^3 r_j y_j \cdot \sum_{j=1}^3 r_j x_j} \quad (\text{S5})$$

Then Eq. (S6) is obtained by substituting Eq. (S3) into Eq. (10).

$$\begin{aligned} \ln S^C &= 5(q_1 - q_2) \left( \ln \frac{\sum_{j=1}^3 q_j y_j}{\sum_{j=1}^3 r_j y_j} - \ln \frac{\sum_{j=1}^3 q_j x_j}{\sum_{j=1}^3 r_j x_j} \right) + (r_1 - r_2) \left[ 5 \left( \frac{\sum_{j=1}^3 x_j q_j}{\sum_{j=1}^3 r_j x_j} - \frac{\sum_{j=1}^3 y_j q_j}{\sum_{j=1}^3 r_j y_j} \right) + \frac{\sum_{j=1}^3 r_j (x_j - y_j)}{\sum_{j=1}^3 r_j y_j \cdot \sum_{j=1}^3 r_j x_j} \right] \\ &= 5(q_1 - q_2) \ln \frac{\sum_{j=1}^3 q_j y_j}{\sum_{j=1}^3 r_j y_j} - 5(r_1 - r_2) \frac{\sum_{j=1}^3 q_j y_j}{\sum_{j=1}^3 r_j y_j} - \left[ 5(q_1 - q_2) \ln \frac{\sum_{j=1}^3 q_j x_j}{\sum_{j=1}^3 r_j x_j} - 5(r_1 - r_2) \frac{\sum_{j=1}^3 q_j x_j}{\sum_{j=1}^3 r_j x_j} \right] \\ &\quad + (r_1 - r_2) \frac{\sum_{j=1}^3 r_j (x_j - y_j)}{\sum_{j=1}^3 r_j y_j \cdot \sum_{j=1}^3 r_j x_j} \quad (\text{S6}) \end{aligned}$$

If parameters  $A_1$  and  $A_2$  are introduced here as:

$$\frac{\sum_{j=1}^3 q_j y_j}{\sum_{j=1}^3 r_j y_j} = A_1; \quad \frac{\sum_{j=1}^3 q_j x_j}{\sum_{j=1}^3 r_j x_j} = A_2 \quad (\text{S7})$$

Eq. (S7) is substituted into Eq. (S6), and then Eq. (9) on the page 7 in the paper is obtained.

## Four situations for function $f(A)$

### 2.1 The first situation ( $q_1 > q_2$ , $r_1 > r_2$ )

From Eq. (11), when  $f'(A) > 0$ , there is  $A < \frac{q_1 - q_2}{r_1 - r_2} = A_0$ ; When  $f'(A) < 0$ , there is

$$A > \frac{q_1 - q_2}{r_1 - r_2} > A_0.$$

If  $A$  is equal to  $A_1$  in Eq. (S7), then

$$\begin{aligned} A_1 - A_0 &= \frac{q_1 y_1 + q_2 y_2 + q_3 y_3}{r_1 y_1 + r_2 y_2 + r_3 y_3} - \frac{q_1 - q_2}{r_1 - r_2} \\ &= \frac{(y_1 + y_2)(r_1 q_2 - r_2 q_1) + y_3(q_3(r_1 - r_2) - r_3(q_1 - q_2))}{(r_1 y_1 + r_2 y_2 + r_3 y_3)(r_1 - r_2)} \end{aligned} \quad (S8)$$

(I) From Eq. (S8), if  $\frac{r_1}{q_1} > \frac{r_2}{q_2}$ , and  $0 < \frac{r_3}{q_3} < \frac{r_1 - r_2}{q_1 - q_2}$ ,  $A_1 > A_0$ , The function is a

decreasing function in this region. Then, the relationship between  $A_2$  and  $A_1$  is discussed.

From Eq. (S7),

$$\begin{aligned} A_2 - A_1 &= \frac{q_1 x_1 + q_2 x_2 + q_3 x_3}{r_1 x_1 + r_2 x_2 + r_3 x_3} - \frac{q_1 y_1 + q_2 y_2 + q_3 y_3}{r_1 y_1 + r_2 y_2 + r_3 y_3} \\ &= \frac{(x_2 y_1 - x_1 y_2)(r_1 q_2 - r_2 q_1) + (x_3 y_1 - x_1 y_3)(r_1 q_3 - r_3 q_1) + (x_3 y_2 - x_2 y_3)(r_2 q_3 - r_3 q_2)}{(r_1 x_1 + r_2 x_2 + r_3 x_3)(r_1 y_1 + r_2 y_2 + r_3 y_3)} \end{aligned} \quad (S9)$$

When phase equilibrium is reached,  $y_1 > x_1$ ,  $y_2 < x_2$ ,  $y_3 > x_3$ .

From above equation, when  $\frac{r_3}{q_3} > \frac{r_1}{q_1} > \frac{r_2}{q_2}$ ,  $A_2 > A_1$ , hence  $f(A_1) - f(A_2) > 0$ .

Next, the value  $A_1$  with the same function value  $A_1'$  will be solved.

From Eq. (10),

$$f(A_1) = (q_1 - q_2) \ln A_1 - A_1(r_1 - r_2) \quad (S10)$$

$$f(A_1') = (q_1 - q_2) \ln A_1' - A_1'(r_1 - r_2) \quad (S11)$$

Set  $f(A_1) = f(A_1')$ , then Eq. (S12) was obtained.

$$\frac{A_1 - A_1'}{\ln A_1 - \ln A_1'} = \frac{q_1 - q_2}{r_1 - r_2} \quad (\text{S12})$$

When  $\frac{1}{2} \leq \frac{A_1}{A_1'} \leq 2$ , Eq. (S12) can be approximated as Eq. (S13).

$$A_1' = 2 \frac{q_1 - q_2}{r_1 - r_2} - A_1 \quad (\text{S13})$$

At this point, since  $A_1'$  is on the side of the increasing function, when  $A_2 < A_1'$ , then

$$f(A_1') - f(A_2) > 0, \text{ that is } f(A_1) - f(A_2) > 0.$$

So,  $A_2 - A_1' < 0$ .

$$\text{That is, } \frac{q_1 x_1 + q_2 x_2 + q_3 x_3}{r_1 x_1 + r_2 x_2 + r_3 x_3} - [2 \frac{q_1 - q_2}{r_1 - r_2} - \frac{q_1 y_1 + q_2 y_2 + q_3 y_3}{r_1 y_1 + r_2 y_2 + r_3 y_3}] < 0$$

$$\frac{(x_1 + x_2)(r_1 q_2 - r_2 q_1) + x_3 [q_3(r_1 - r_2) - r_3(q_1 - q_2)]}{(r_1 - r_2)(r_1 x_1 + r_2 x_2 + r_3 x_3)} +$$

$$\frac{(y_1 + y_2)(r_1 q_2 - r_2 q_1) + y_3 [q_3(r_1 - r_2) - r_3(q_1 - q_2)]}{(r_1 - r_2)(r_1 y_1 + r_2 y_2 + r_3 y_3)} < 0 \quad (\text{S14})$$

Therefore  $r_1 q_2 - r_2 q_1 > 0$ , if Eq. (S14) is satisfied, then

$$q_3(r_1 - r_2) - r_3(q_1 - q_2) < 0$$

$$\text{That is, } \frac{r_3}{q_3} > \frac{r_1 - r_2}{q_1 - q_2} \quad (\text{S15})$$

Since this result is contradicted with the previous conclusion ( $0 < \frac{r_3}{q_3} < \frac{r_1 - r_2}{q_1 - q_2}$ ), the

case of  $A_1$  and  $A_2$  on the same side of  $A_0$  was considered in the following discussion.

Besides, when  $\sum_{j=1}^3 r_j(x_j - y_j) > 0$ , that is  $(r_1 - r_3)(x_1 - y_1) + (r_2 - r_3)(x_2 - y_2) > 0$ , Due

$$\text{to } r_1 > r_2, \text{ when } r_3 > r_1, \frac{\sum_{j=1}^3 r_j(x_j - y_j)}{\sum_{j=1}^3 r_j y_j \cdot \sum_{j=1}^3 r_j x_j} > 0.$$

Hence,

$$\begin{aligned}
\ln S^C &= 5(q_1 - q_2) \ln A_1 - 5(r_1 - r_2)A_1 - [5(q_1 - q_2) \ln A_2 - 5(r_1 - r_2)A_2] \\
&\quad + (r_1 - r_2) \frac{\sum_{j=1}^3 r_j (x_j - y_j)}{\sum_{j=1}^3 r_j y_j \cdot \sum_{j=1}^3 r_j x_j} \\
&= 5[f(A_1) - f(A_2)] + (r_1 - r_2) \frac{\sum_{j=1}^3 r_j (x_j - y_j)}{\sum_{j=1}^3 r_j y_j \cdot \sum_{j=1}^3 r_j x_j} > 0
\end{aligned} \tag{S16}$$

That is  $S^C > 1$ .

(II) From Eq. (S8), if  $\frac{r_1}{q_1} < \frac{r_2}{q_2}$ , and  $\frac{r_3}{q_3} > \frac{r_1 - r_2}{q_1 - q_2} > 0$ . Then  $A_1 < A_0$ ,  $f(A)$  is an increasing function.

When  $\frac{r_3}{q_3} < \frac{r_1}{q_1} < \frac{r_2}{q_2}$ , then  $A_2 - A_1 < 0$ ,  $f(A_1) - f(A_2) > 0$ , meanwhile,  $r_3 > r_1$  is

satisfied, the combinational selectivity is  $S^C > 1$ .

From what has been discussed above, when  $q_1 > q_2$ ,  $r_1 > r_2$ ,

a. If  $\frac{r_3}{q_3} > \frac{r_1}{q_1} > \frac{r_2}{q_2}$  and  $r_3 > r_1$  are satisfied at the same time, the combinational

selectivity is  $S^C > 1$ .

b. If  $\frac{r_3}{q_3} < \frac{r_1}{q_1} < \frac{r_2}{q_2}$  and  $r_3 > r_1$  are simultaneously satisfied, the combinational

selectivity is  $S^C > 1$ .

## 2.2 The second situation ( $q_1 < q_2$ , $r_1 < r_2$ )

(I) From Eq. (S8), if  $\frac{r_1}{q_1} < \frac{r_2}{q_2}$ ,  $\frac{r_3}{q_3} > \frac{r_1 - r_2}{q_1 - q_2} > 0$ , and  $A_1 > A_0$ . The function  $f(A)$  is a

decreasing function in the region, then the relationship between  $A_2$  and  $A_1$  will be

discussed.

From Eq. (S9), when  $\frac{r_3}{q_3} < \frac{r_2}{q_2}$ ,  $A_2 > A_1$ , then  $f(A_1) - f(A_2) > 0$ .

Moreover, when  $\sum_{j=1}^3 r_j(x_j - y_j) > 0$ , that is  $(r_1 - r_3)(x_1 - y_1) + (r_2 - r_3)(x_2 - y_2) > 0$ ,

Because of  $r_1 < r_2$ , when  $r_3 < r_1$ ,  $\frac{\sum_{j=1}^3 r_j(x_j - y_j)}{\sum_{j=1}^3 r_j y_j \cdot \sum_{j=1}^3 r_j x_j} > 0$ . It equates to  $\ln S^C > 0$ ,  $S^C > 1$ .

(II) From Eq. (S8), when  $\frac{r_1}{q_1} > \frac{r_2}{q_2}$ , and  $0 < \frac{r_3}{q_3} < \frac{r_1 - r_2}{q_1 - q_2}$ ,  $A_1 < A_0$ . The function

$f(A)$  is an increasing function in the region, then the relationship between  $A_2$  and  $A_1$  will be discussed.

From Eq. (S9), when  $\frac{r_3}{q_3} > \frac{r_2}{q_2}$ ,  $A_2 < A_1$ , then  $f(A_1) - f(A_2) > 0$ .

Besides, when  $\sum_{j=1}^3 r_j(x_j - y_j) > 0$ , that is  $(r_1 - r_3)(x_1 - y_1) + (r_2 - r_3)(x_2 - y_2) > 0$ ,

Because of  $r_1 < r_2$ , when  $r_3 < r_1$ ,  $\frac{\sum_{j=1}^3 r_j(x_j - y_j)}{\sum_{j=1}^3 r_j y_j \cdot \sum_{j=1}^3 r_j x_j} > 0$ . That is  $\ln S^C > 0$ , and  $S^C > 1$ .

From what has been discussed above, when  $q_1 < q_2$ , and  $r_1 < r_2$

a. If  $\frac{r_3}{q_3} > \frac{r_2}{q_2} > \frac{r_1}{q_1}$ , and  $r_3 < r_1$ . Then, the combinational selectivity is  $S^C > 1$ .

b. If  $\frac{r_3}{q_3} < \frac{r_2}{q_2} < \frac{r_1}{q_1}$ , and  $r_3 < r_1$ . The combinational selectivity is  $S^C > 1$ .

### 2.3 The third situation ( $q_1 > q_2$ , $r_1 < r_2$ )

From Eq. (11),  $f'(A) = \frac{q_1 - q_2}{A} - (r_1 - r_2) > 0$ , thus the function  $f(A)$  is an



increasing function. If  $A_1 - A_0 < 0$ , then  $\frac{r_1}{q_1} > \frac{r_2}{q_2}$ , and  $0 < \frac{r_3}{q_3} < \frac{r_1 - r_2}{q_1 - q_2}$ .

When  $A_2 - A_1 < 0$ , then  $f(A_2) < f(A_1)$ .

So,  $\frac{r_1}{q_1} < \frac{r_3}{q_3}$  and  $\frac{r_2}{q_2} < \frac{r_3}{q_3}$  are taken from Eq. (S9).

In addition, when  $r_3 < r_1$ , the last term in Eq. (9) is greater than 0.

Therefore, when  $q_1 > q_2$ ,  $r_1 < r_2$ ,  $r_3 < r_1$ ,  $\frac{r_3}{q_3} < \frac{r_2}{q_2} < \frac{r_1}{q_1}$ , the combinational selectivity

is  $S^C > 1$ .

#### 2.4 The fourth situation ( $q_1 < q_2$ , $r_1 > r_2$ )

From Eq. (11),  $f'(A) = \frac{q_1 - q_2}{A} - (r_1 - r_2) < 0$ , so the function  $f(A)$  is a decreasing

function. If  $A_1 - A_0 > 0$ , then  $\frac{r_1}{q_1} > \frac{r_2}{q_2}$ , and  $0 < \frac{r_3}{q_3} < \frac{r_1 - r_2}{q_1 - q_2}$ .

When  $A_2 - A_1 > 0$ ,  $f(A_2) < f(A_1)$ ,

Hence, it could be obtained from Eq. (S9) that  $r_1 q_3 - r_3 q_1 < 0$  and  $r_2 q_3 - r_3 q_2 < 0$ .

That is  $\frac{r_1}{q_1} < \frac{r_3}{q_3}$  and  $\frac{r_2}{q_2} < \frac{r_3}{q_3}$ , or expressed as  $\frac{r_3}{q_3} > \frac{r_1}{q_1} > \frac{r_2}{q_2}$ .

Besides, when  $r_3 > r_2$ , the last term in Eq. (9) is greater than 0.

Therefore, when  $q_1 < q_2$ ,  $r_1 > r_2$ ,  $r_3 > r_2$ ,  $\frac{r_3}{q_3} > \frac{r_1}{q_1} > \frac{r_2}{q_2}$ , the combinational

selectivity is  $S^C > 1$ .

### Residual selectivity $S^R$

The residual term Eq. (4) of activity coefficient is substituted into the Eq. (12) to obtain:

$$\begin{aligned}\ln S^R &= \ln(r_1^R)^r - \ln(r_1^R)^e - [\ln(r_2^R)^r - \ln(r_2^R)^e] \\ &= \sum_k v_k^{(1)} [\ln \Gamma_k - \ln \Gamma_k^{(1)}]^r - \sum_k v_k^{(1)} [\ln \Gamma_k - \ln \Gamma_k^{(1)}]^e \\ &\quad - \left\{ \sum_k v_k^{(2)} [\ln \Gamma_k - \ln \Gamma_k^{(2)}]^r - \sum_k v_k^{(2)} [\ln \Gamma_k - \ln \Gamma_k^{(2)}]^e \right\}\end{aligned}\quad (S17)$$

$[\ln \Gamma_k^{(i)}]^r$  and  $[\ln \Gamma_k^{(i)}]^e$  are only related to the group in component  $i$ . For the separated component  $i$ , there is:  $[\ln \Gamma_k^{(i)}]^r = [\ln \Gamma_k^{(i)}]^e$ .

Hence, the Eq. (S18) can be obtained.

$$\begin{aligned}\ln S^R &= \sum_{k=1}^{k_1} v_k^{(1)} [\ln \Gamma_k^r - \ln \Gamma_k^e] - \sum_{k=1}^{k_1} v_k^{(2)} [\ln \Gamma_k^r - \ln \Gamma_k^e] \\ &= \sum_{k=1}^{k_1} (v_k^1 - v_k^2) (\ln \Gamma_k^r - \ln \Gamma_k^e)\end{aligned}\quad (S18)$$

In Eq. (S18),

$$\ln \Gamma_k^r - \ln \Gamma_k^e = Q_k \left[ \ln \frac{\sum_m \theta_m^e \psi_{mk}}{\sum_m \theta_m^r \psi_{mk}} + \sum_m \frac{\theta_m^e \psi_{km}}{\sum_n \theta_n^e \psi_{nm}} - \sum_m \frac{\theta_m^r \psi_{km}}{\sum_n \theta_n^r \psi_{nm}} \right] \quad (S19)$$

$$\text{Here } \theta_m^r = \frac{Q_m X_m}{\sum_n Q_n X_n}; \quad \theta_m^e = \frac{Q_m Y_m}{\sum_n Q_n Y_n} \quad (S20)$$

$$X_m = \frac{\sum_{i=1}^3 v_m^{(i)} x_i}{\sum_{i=1}^3 \sum_{k=1}^{k_1} v_k^{(i)} x_i}; \quad Y_m = \frac{\sum_{i=1}^3 v_m^{(i)} y_i}{\sum_{i=1}^3 \sum_{k=1}^{k_1} v_k^{(i)} y_i} \quad (S21)$$

In the above equations,  $k_1$  is the total number of groups contained in components 1, 2 and 3. It is assumed that the groups in component 3 (solvent, also called extractant in this case) are different from those in components 1 and 2, and even if they are the same, they are treated as different groups and the calculated results are the same.

$$\text{Set } v_k^{(1)} - v_k^{(2)} = v_k' \quad (\text{S22})$$

$$Z_{k,m}^e = \frac{\theta_m^e \psi_{km}}{\sum_n \theta_n^e \psi_{nm}}; \quad Z_{k,m}^r = \frac{\theta_m^r \psi_{km}}{\sum_n \theta_n^r \psi_{nm}} \quad (\text{S23})$$

Thus, the Eq. (S18) can be reduced to the following Eq. (S24).

$$\begin{aligned} \ln S^R &= v_1' Q_1 (\ln \sum_m \theta_m^e \psi_{m,1} - \ln \sum_m \theta_m^r \psi_{m,1} + \sum_m Z_{1,m}^e - \sum_m Z_{1,m}^r) \\ &\quad + v_2' Q_2 (\ln \sum_m \theta_m^e \psi_{m,2} - \ln \sum_m \theta_m^r \psi_{m,2} + \sum_m Z_{2,m}^e - \sum_m Z_{2,m}^r) \\ &\quad + \dots \\ &\quad + v_k' Q_k (\ln \sum_m \theta_m^e \psi_{m,k} - \ln \sum_m \theta_m^r \psi_{m,k} + \sum_m Z_{k,m}^e - \sum_m Z_{k,m}^r) \\ &\quad + \dots \\ &\quad + v_{k_1}' Q_{k_1} (\ln \sum_m \theta_m^e \psi_{m,k_1} - \ln \sum_m \theta_m^r \psi_{m,k_1} + \sum_m Z_{k_1,m}^e - \sum_m Z_{k_1,m}^r) \\ &= v_1' Q_1 (\ln \sum_m \theta_m^e \psi_{m,1} + \sum_m Z_{1,m}^e) + v_1' Q_1 (-\ln \sum_m \theta_m^r \psi_{m,1} - \sum_m Z_{1,m}^r) \\ &\quad + v_2' Q_2 (\ln \sum_m \theta_m^e \psi_{m,2} + \sum_m Z_{2,m}^e) + v_2' Q_2 (-\ln \sum_m \theta_m^r \psi_{m,2} - \sum_m Z_{2,m}^r) \\ &\quad + \dots \\ &\quad + v_k' Q_k (\ln \sum_m \theta_m^e \psi_{m,k} + \sum_m Z_{k,m}^e) + v_k' Q_k (-\ln \sum_m \theta_m^r \psi_{m,k} - \sum_m Z_{k,m}^r) \\ &\quad + \dots \\ &\quad + v_{k_1}' Q_{k_1} (\ln \sum_m \theta_m^e \psi_{m,k_1} + \sum_m Z_{k_1,m}^e) + v_{k_1}' Q_{k_1} (-\ln \sum_m \theta_m^r \psi_{m,k_1} - \sum_m Z_{k_1,m}^r) \end{aligned} \quad (\text{S24})$$

The final expression Eq. (13) of  $\ln S^R$  can be obtained from Eq. (S24).

**Table S1.  $\theta \Psi$  matrix**

|                             |                             |          |                             |                               |                               |          |                              |
|-----------------------------|-----------------------------|----------|-----------------------------|-------------------------------|-------------------------------|----------|------------------------------|
| $\theta_1 \psi_{1,1}$       | $\theta_1 \psi_{1,2}$       | $\cdots$ | $\theta_1 \psi_{1,k}$       | $\theta_1 \psi_{1,k+1}$       | $\theta_1 \psi_{1,k+2}$       | $\cdots$ | $\theta_1 \psi_{1,k1}$       |
| $\theta_2 \psi_{2,1}$       | $\theta_2 \psi_{2,2}$       | $\cdots$ | $\theta_2 \psi_{2,k}$       | $\theta_2 \psi_{2,k+1}$       | $\theta_2 \psi_{2,k+2}$       | $\cdots$ | $\theta_2 \psi_{2,k1}$       |
| $\cdots$                    | $\cdots$                    | $\cdots$ | $\cdots$                    | $\cdots$                      | $\cdots$                      | $\cdots$ | $\cdots$                     |
| $\theta_k \psi_{k,1}$       | $\theta_k \psi_{k,2}$       | $\cdots$ | $\theta_k \psi_{k,k}$       | $\theta_k \psi_{k,k+1}$       | $\theta_k \psi_{k,k+2}$       | $\cdots$ | $\theta_k \psi_{k,k1}$       |
| $\theta_{k+1} \psi_{k+1,1}$ | $\theta_{k+1} \psi_{k+1,2}$ | $\cdots$ | $\theta_{k+1} \psi_{k+1,k}$ | $\theta_{k+1} \psi_{k+1,k+1}$ | $\theta_{k+1} \psi_{k+1,k+2}$ | $\cdots$ | $\theta_{k+1} \psi_{k+1,k1}$ |
| $\theta_{k+2} \psi_{k+2,1}$ | $\theta_{k+2} \psi_{k+2,2}$ | $\cdots$ | $\theta_{k+2} \psi_{k+2,k}$ | $\theta_{k+2} \psi_{k+2,k+1}$ | $\theta_{k+2} \psi_{k+2,k+2}$ | $\cdots$ | $\theta_{k+2} \psi_{k+2,k1}$ |
| $\cdots$                    | $\cdots$                    | $\cdots$ | $\cdots$                    | $\cdots$                      | $\cdots$                      | $\cdots$ | $\cdots$                     |
| $\theta_{k1} \psi_{k1,1}$   | $\theta_{k1} \psi_{k1,2}$   | $\cdots$ | $\theta_{k1} \psi_{k1,k}$   | $\theta_{k1} \psi_{k1,k+1}$   | $\theta_{k1} \psi_{k1,k+2}$   | $\cdots$ | $\theta_{k1} \psi_{k1,k1}$   |
